# Supplementary material for: DNA methylation-estimated phenotypes, telomere length and risk of ischemic stroke: epigenetic age acceleration of screening and a Mendelian randomization study
Source: publisher site journal article supplement (doi:10.18632/aging.206072), 2024-08-16
Supplement: Supplementary file [file aging-v16i16-206072-supplementary-material-SD1.pdf]

**SUPPLEMENTARY FIGURES**

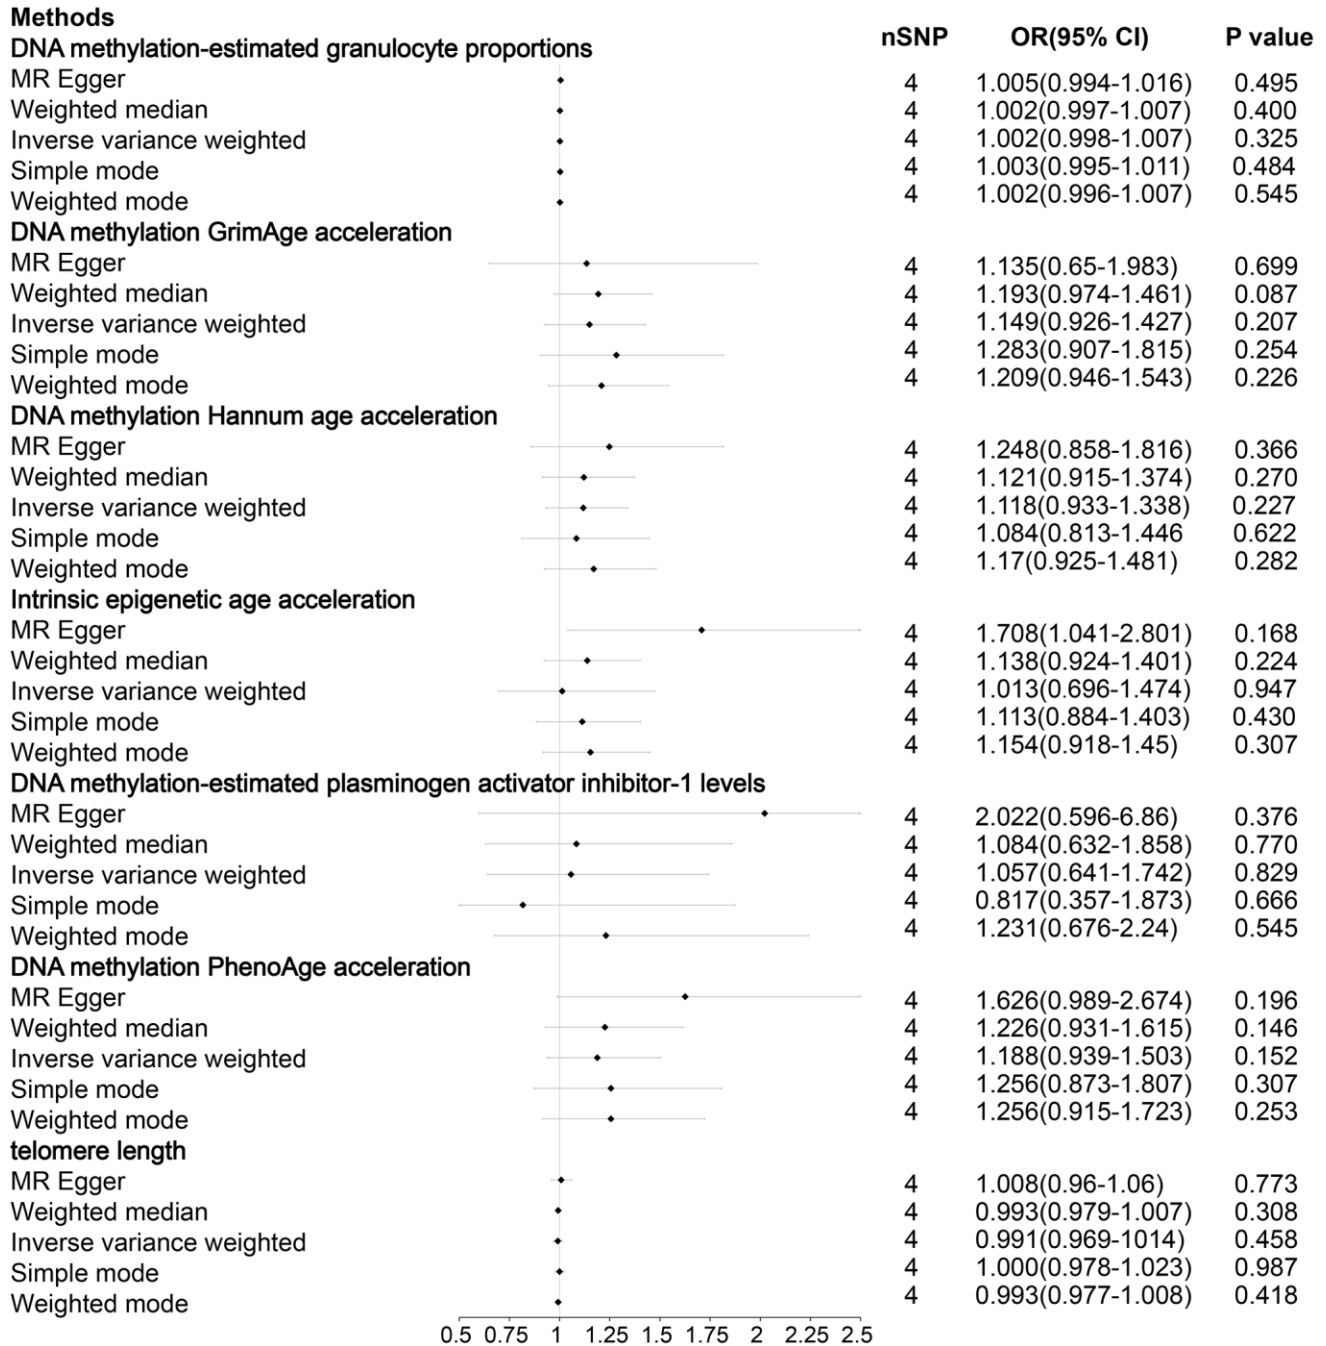

**Supplementary Figure 1.** Examination of the association between an increase in Cardioembolic stroke exposure and the risk of DNA histone modifications-estimated phenotypes and Telomere length, utilising Inverse variance weighed, MR Egger, Simple mode, Weighted mode and Weighted median estimates.

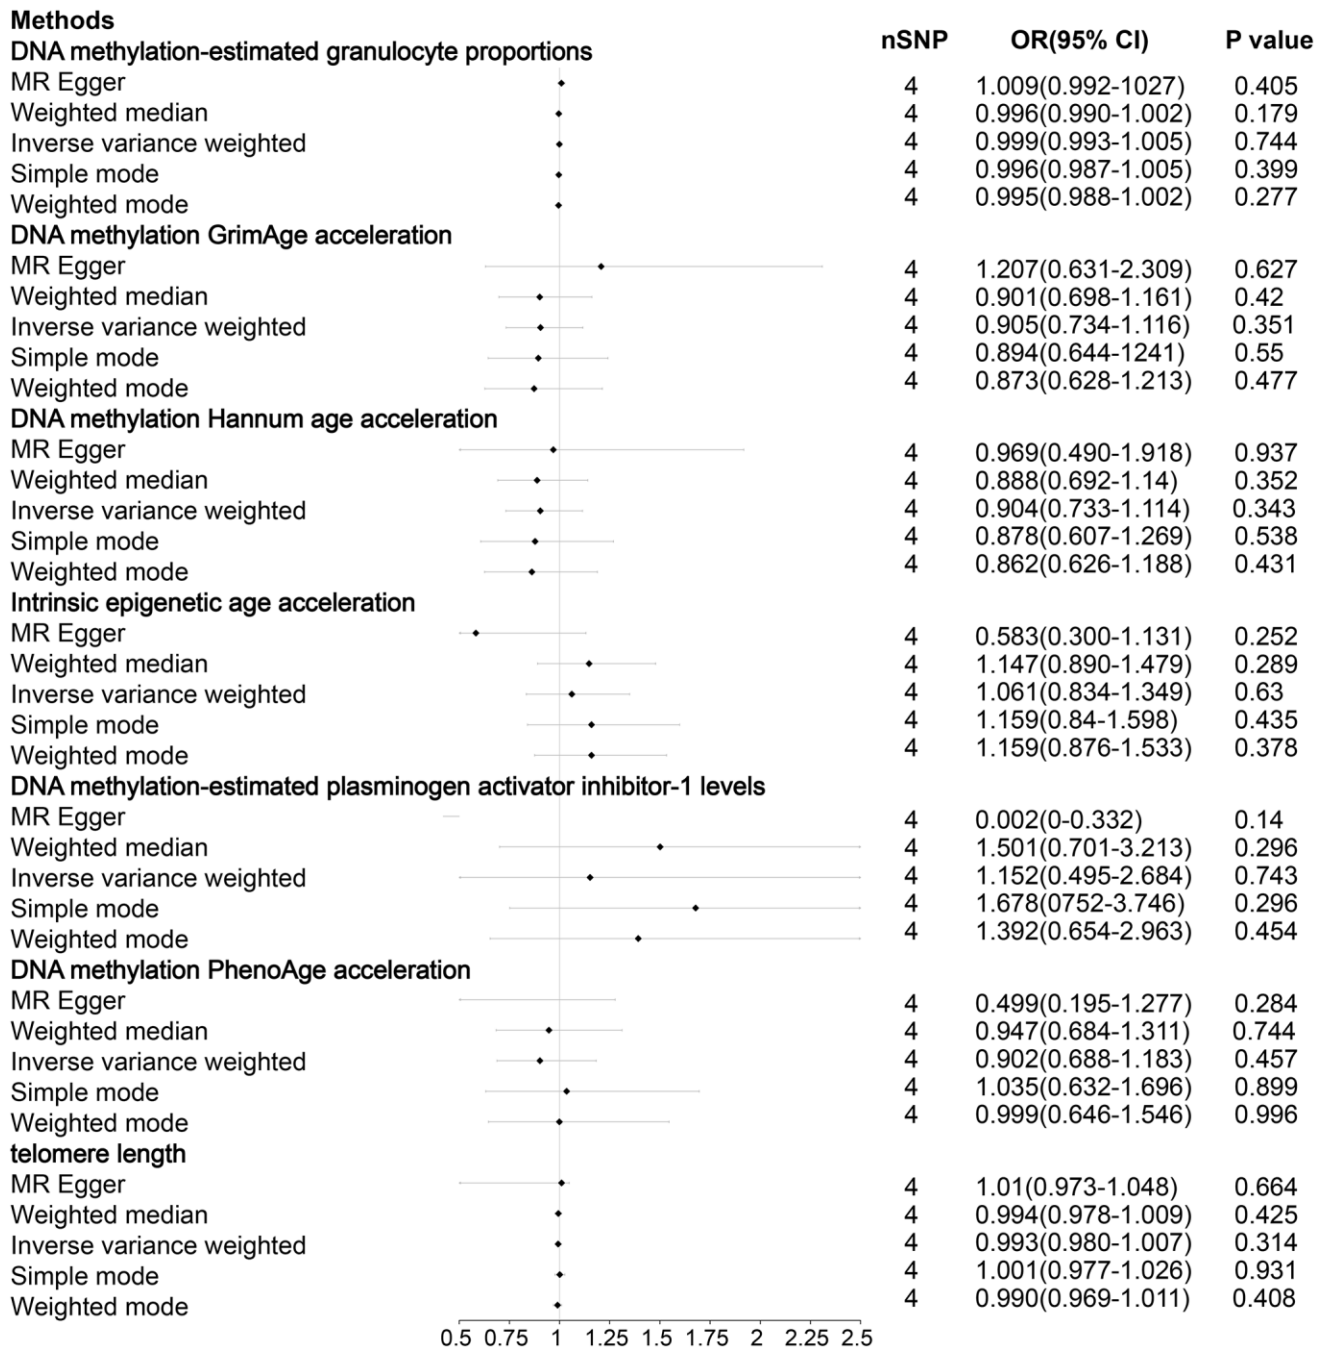

Supplementary Figure 2. Examination of the association between an increase in Large-artery atherosclerosis stroke exposure and the risk of DNA histone modifications-estimated phenotypes and Telomere length, utilising Inverse variance weighed, MR Egger, Simple mode, Weighted mode and Weighted median estimates.

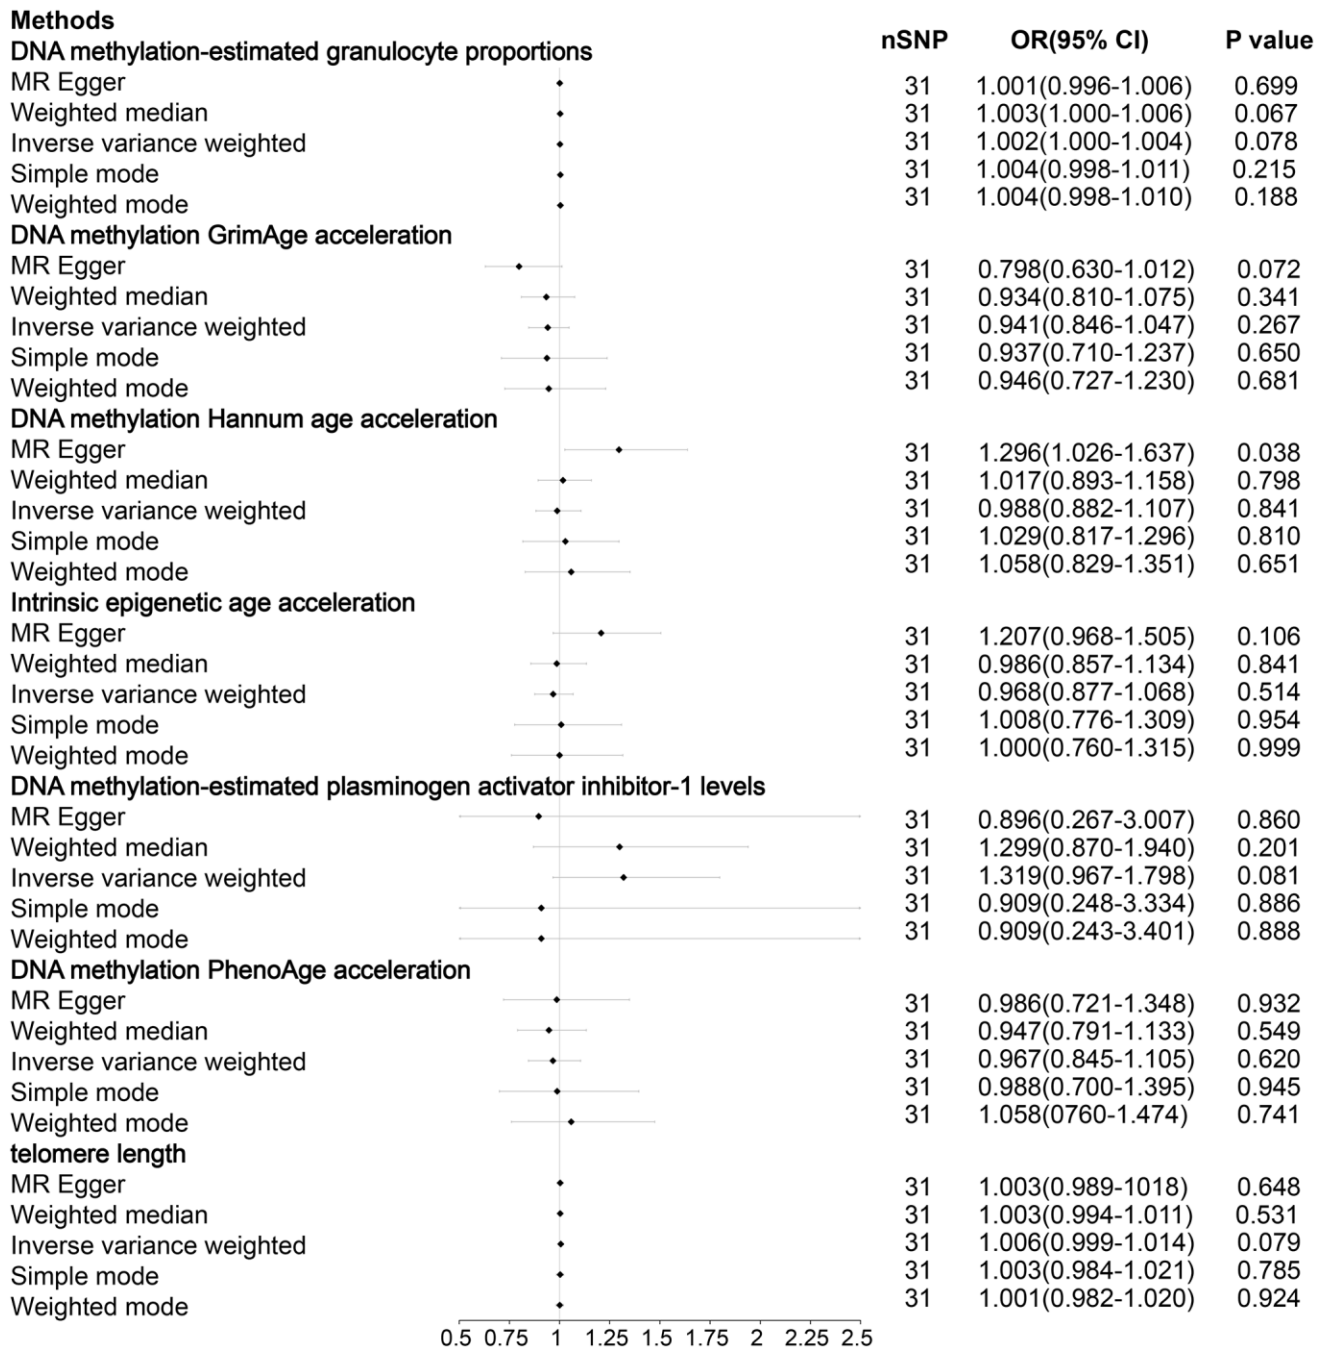

Supplementary Figure 3. Examination of the association between an increase in Small-vessel stroke exposure and the risk of DNA histone modifications-estimated phenotypes and Telomere length, utilising Inverse variance weighed, MR Egger, Simple mode, Weighted mode and Weighted median estimates.

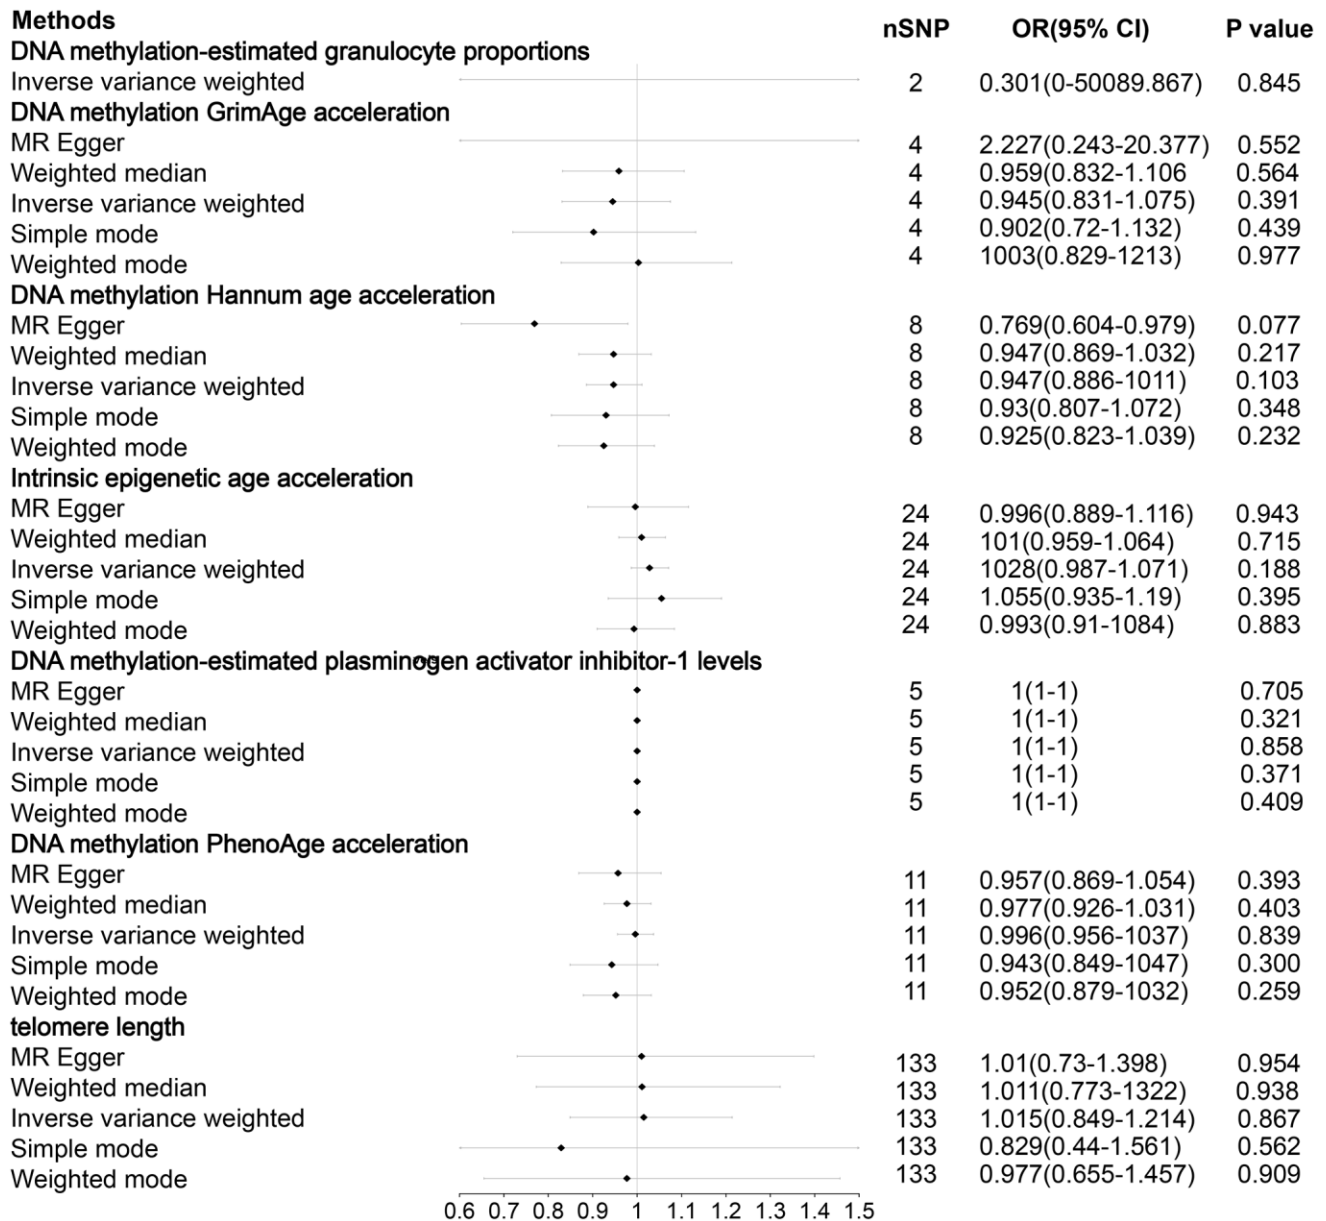

Supplementary Figure 4. Analysis of the association between DNA methylation-estimated phenotypes and Telomere length exposure and the risk of Cardioembolic stroke using Inverse variance weighed, MR Egger, Simple mode, Weighted mode and Weighted median estimates.

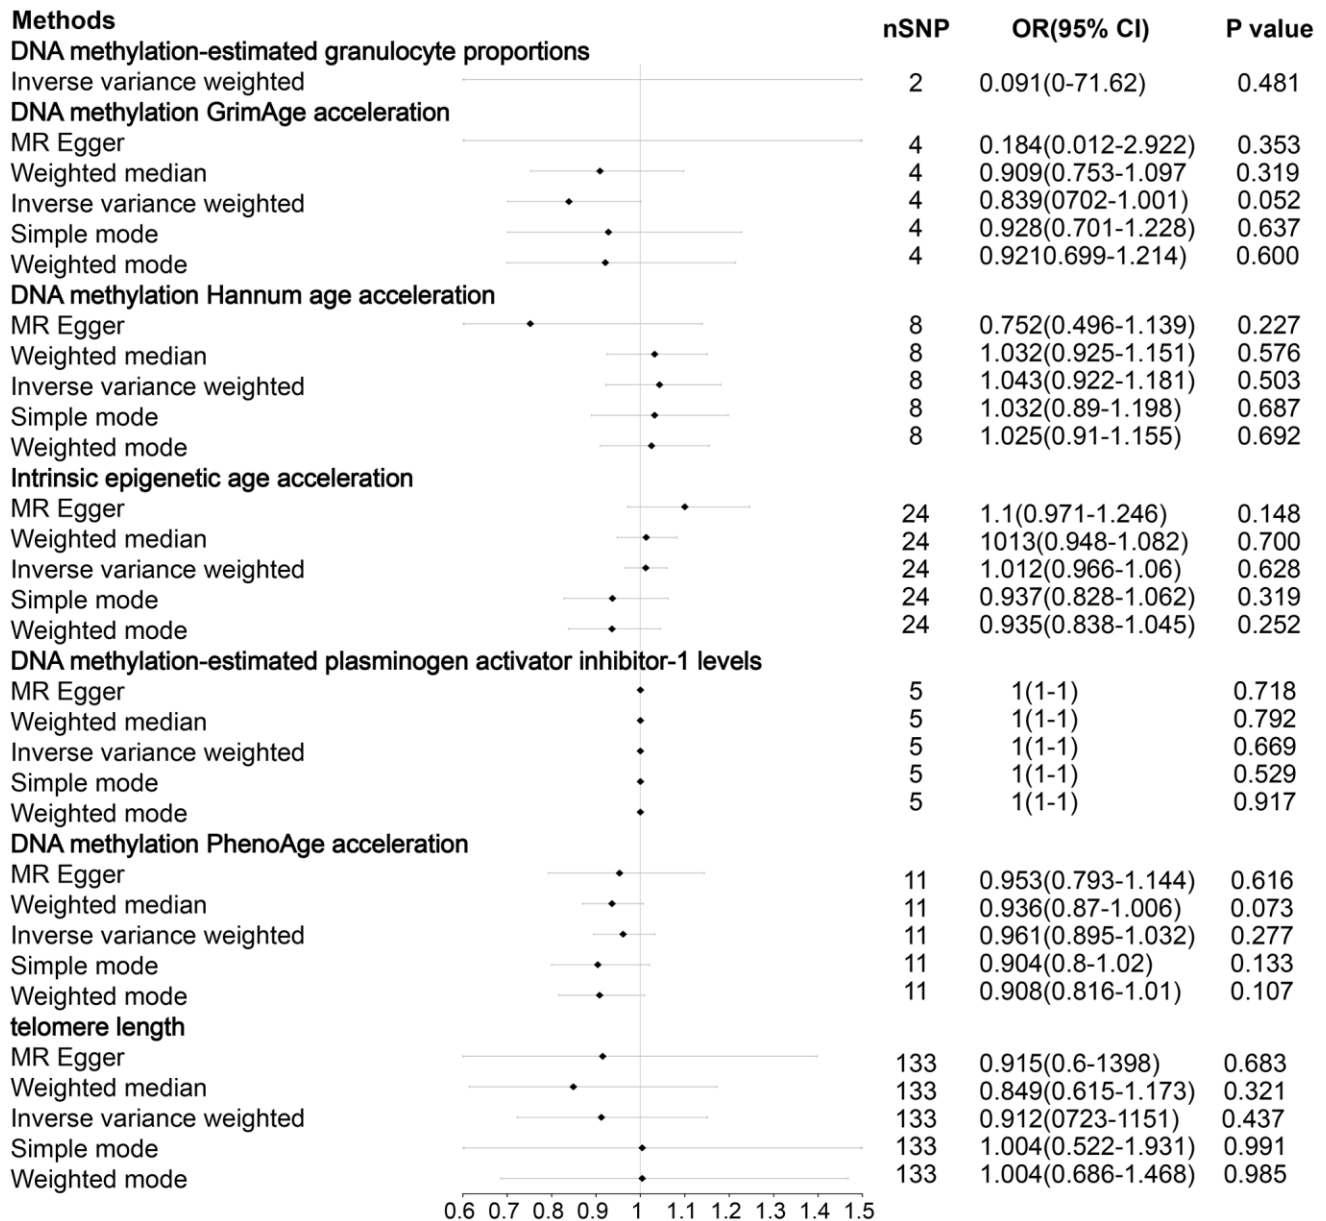

Supplementary Figure 5. Analysis of the association between DNA methylation-estimated phenotypes and Telomere length exposure and the risk of Large-artery atherosclerosis stroke using Inverse variance weighed, MR Egger, Simple mode, Weighted mode and Weighted median estimates.

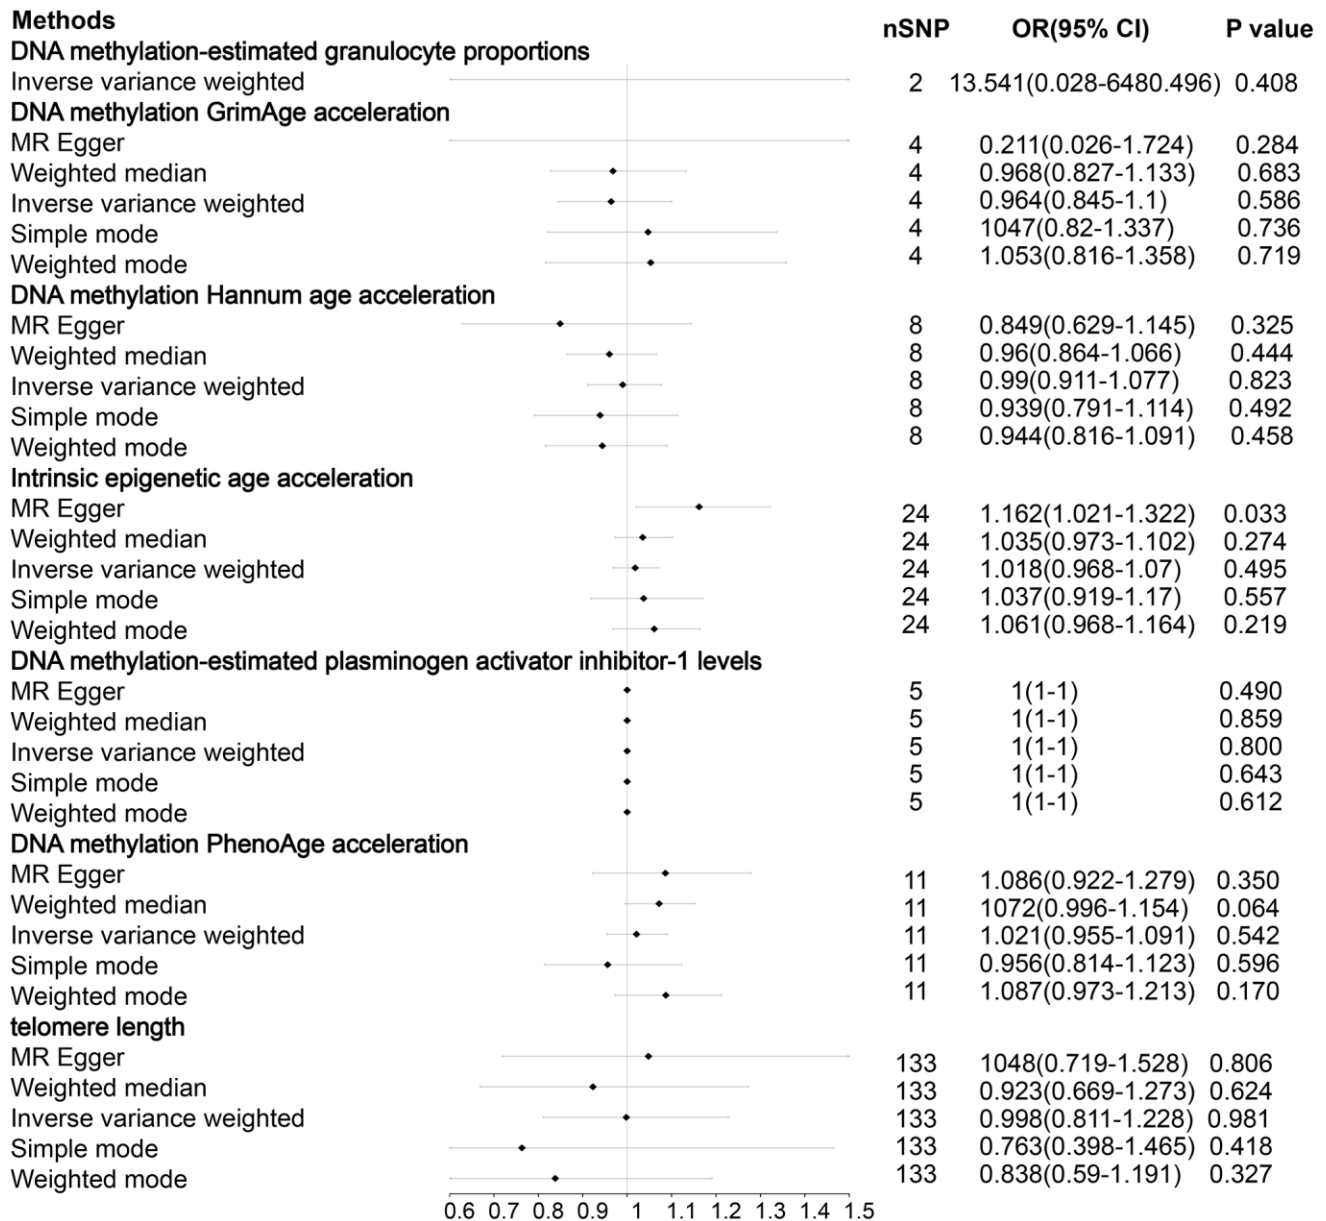

Supplementary Figure 6. Analysis of the association between DNA methylation-estimated phenotypes and Telomere length exposure and the risk of Small-vessel stroke using Inverse variance weighed, MR Egger, Simple mode, Weighted mode and Weighted median estimates.

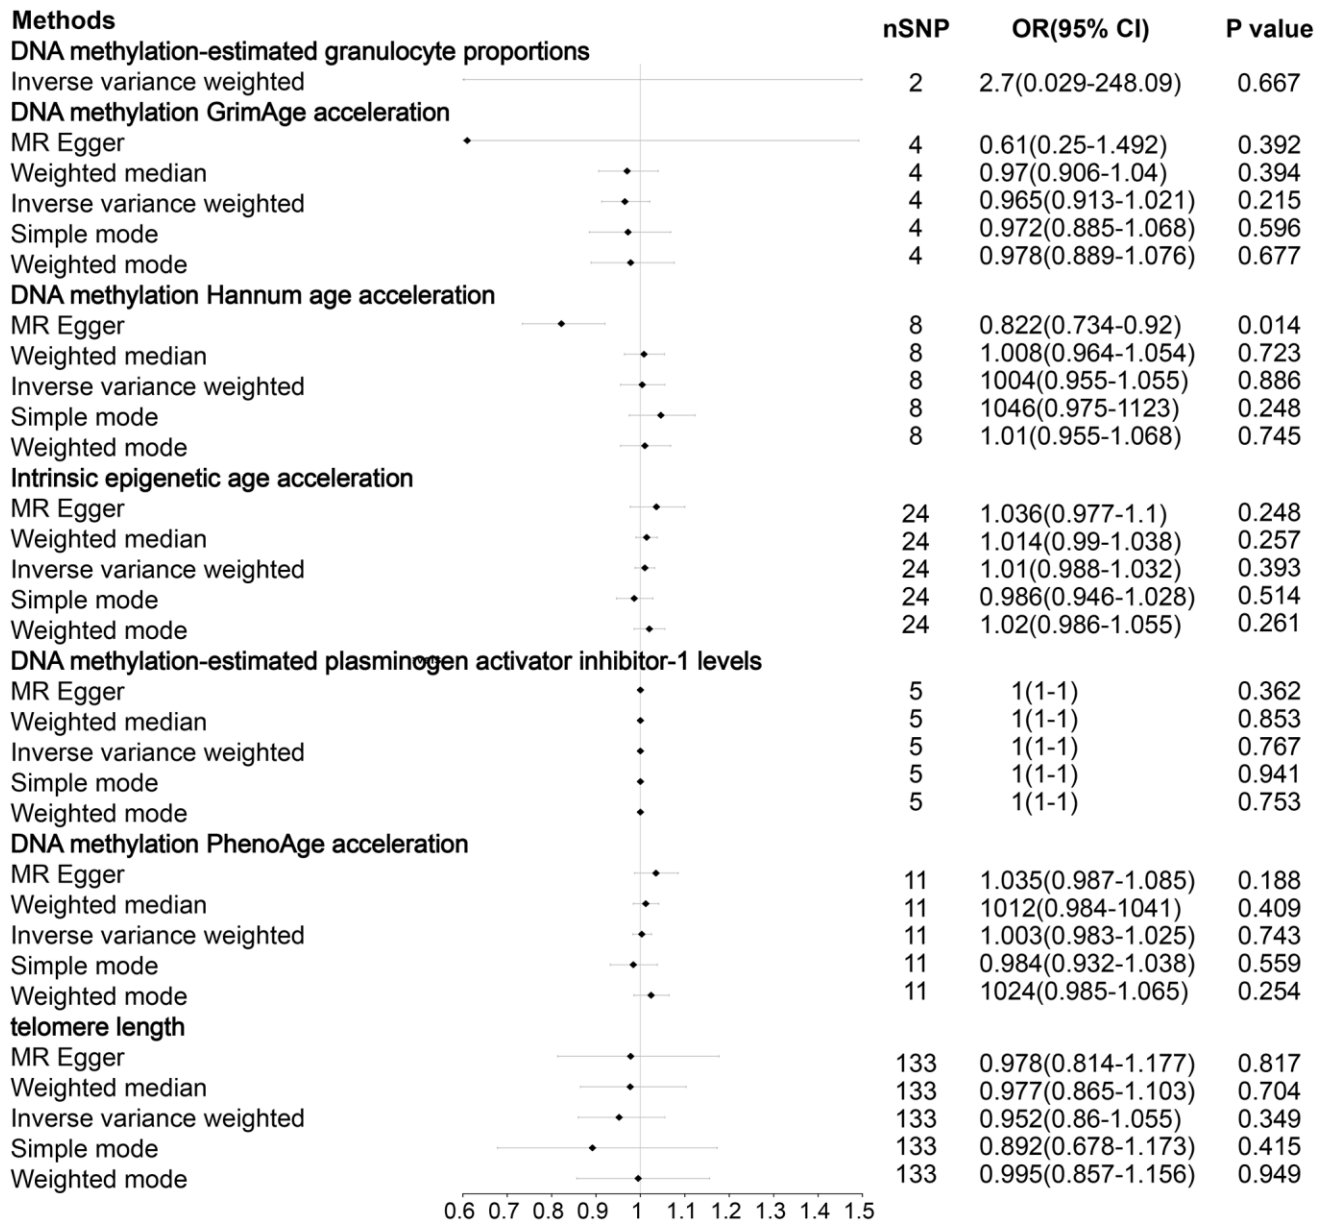

Supplementary Figure 7. Analysis of the association between DNA methylation-estimated phenotypes and Telomere length exposure and the risk of Stroke using Inverse variance weighed, MR Egger, Simple mode, Weighted mode and Weighted median estimates.

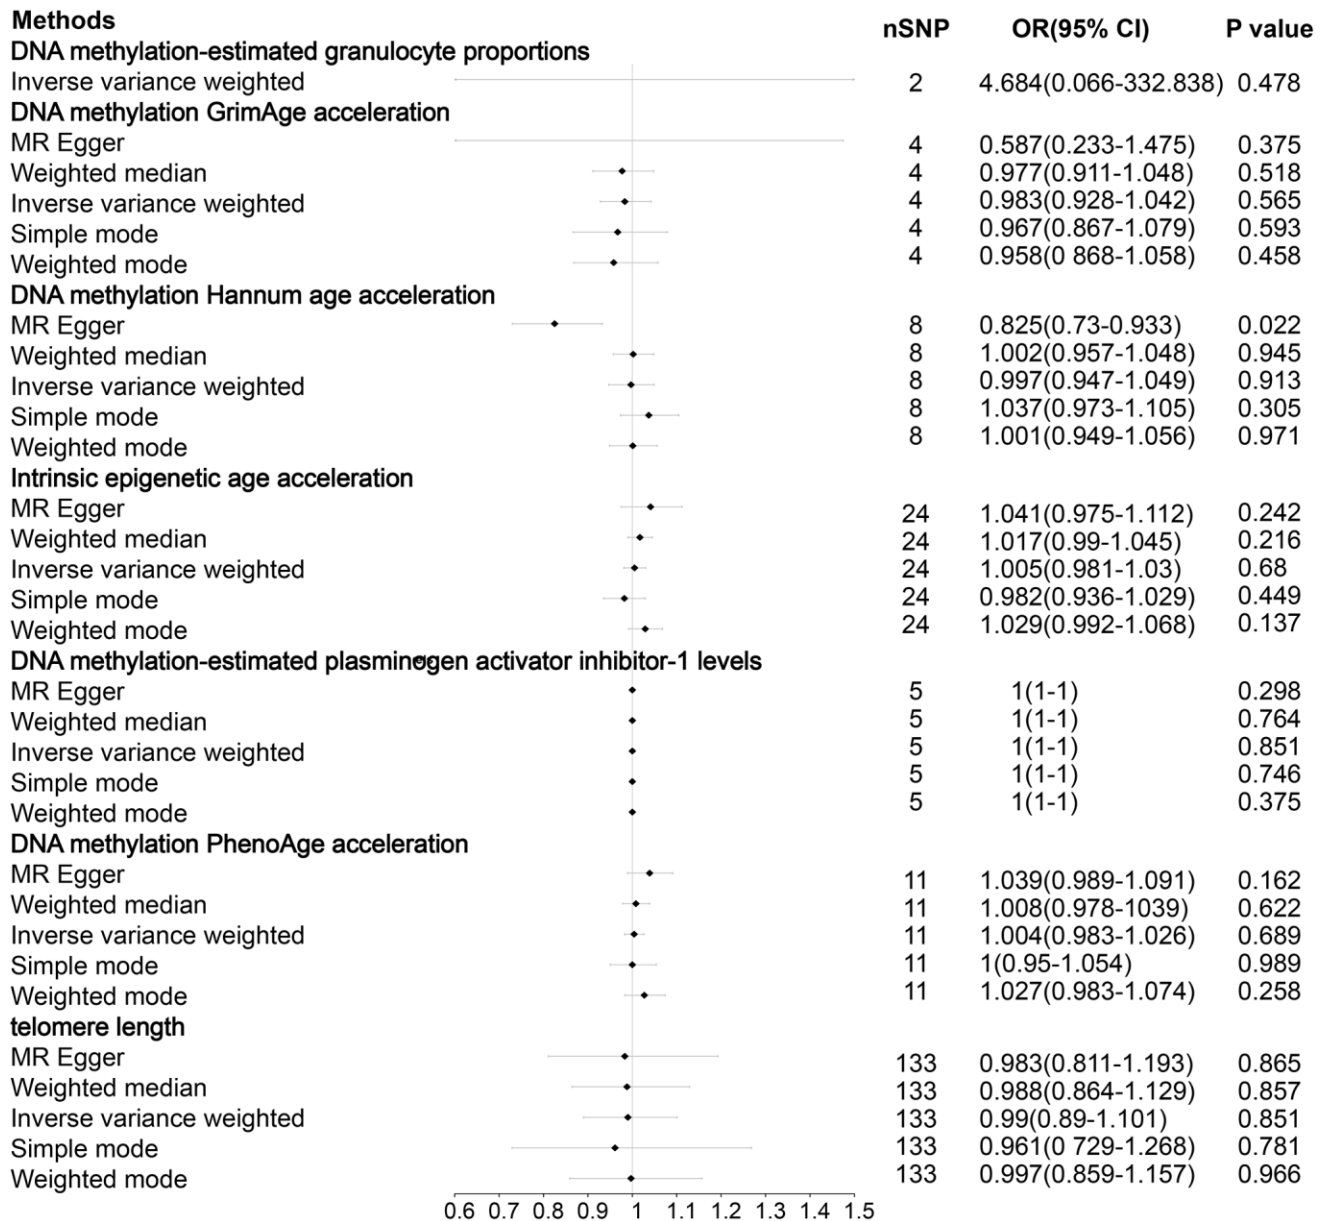

Supplementary Figure 8. Analysis of the association between DNA methylation-estimated phenotypes and Telomere length exposure and the risk of Ischemic stroke using Inverse variance weighted, MR Egger, Simple mode, Weighted mode and Weighted median estimates.
